# Supplementary material
Source: PubMed Central journal article supplement (PMC6376988)

## Hindupur\_supplementary figure \_1

Figure 2a

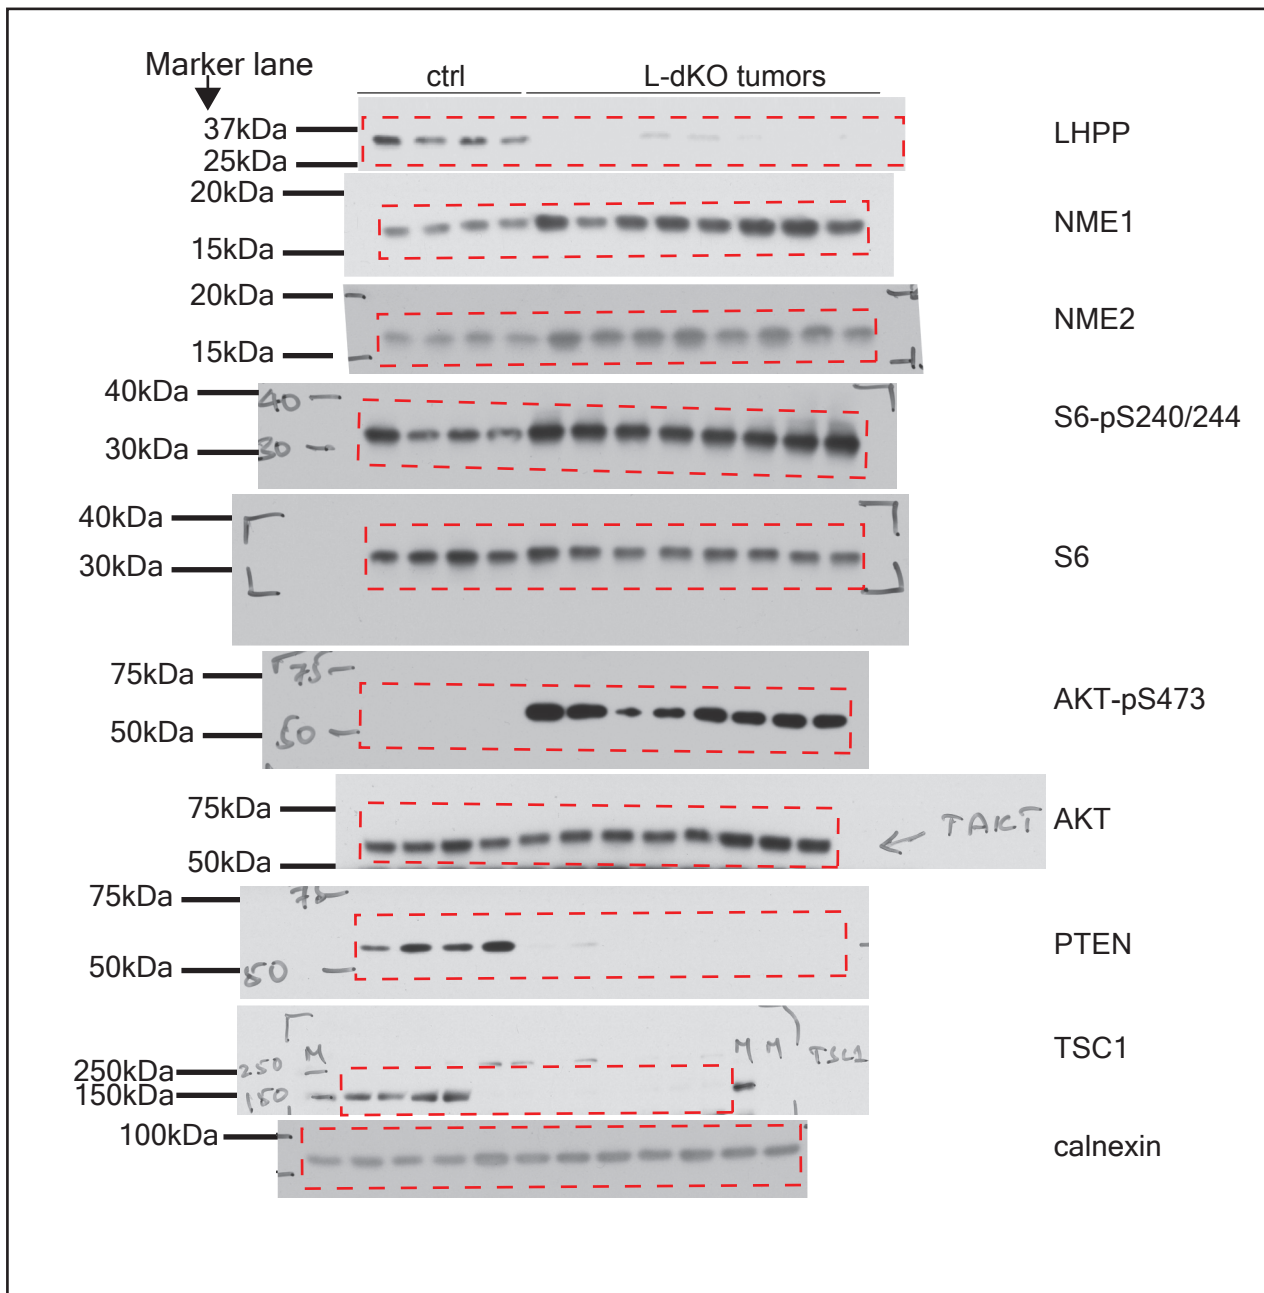

Hindupur\_supplementary figure \_2

Figure 2b

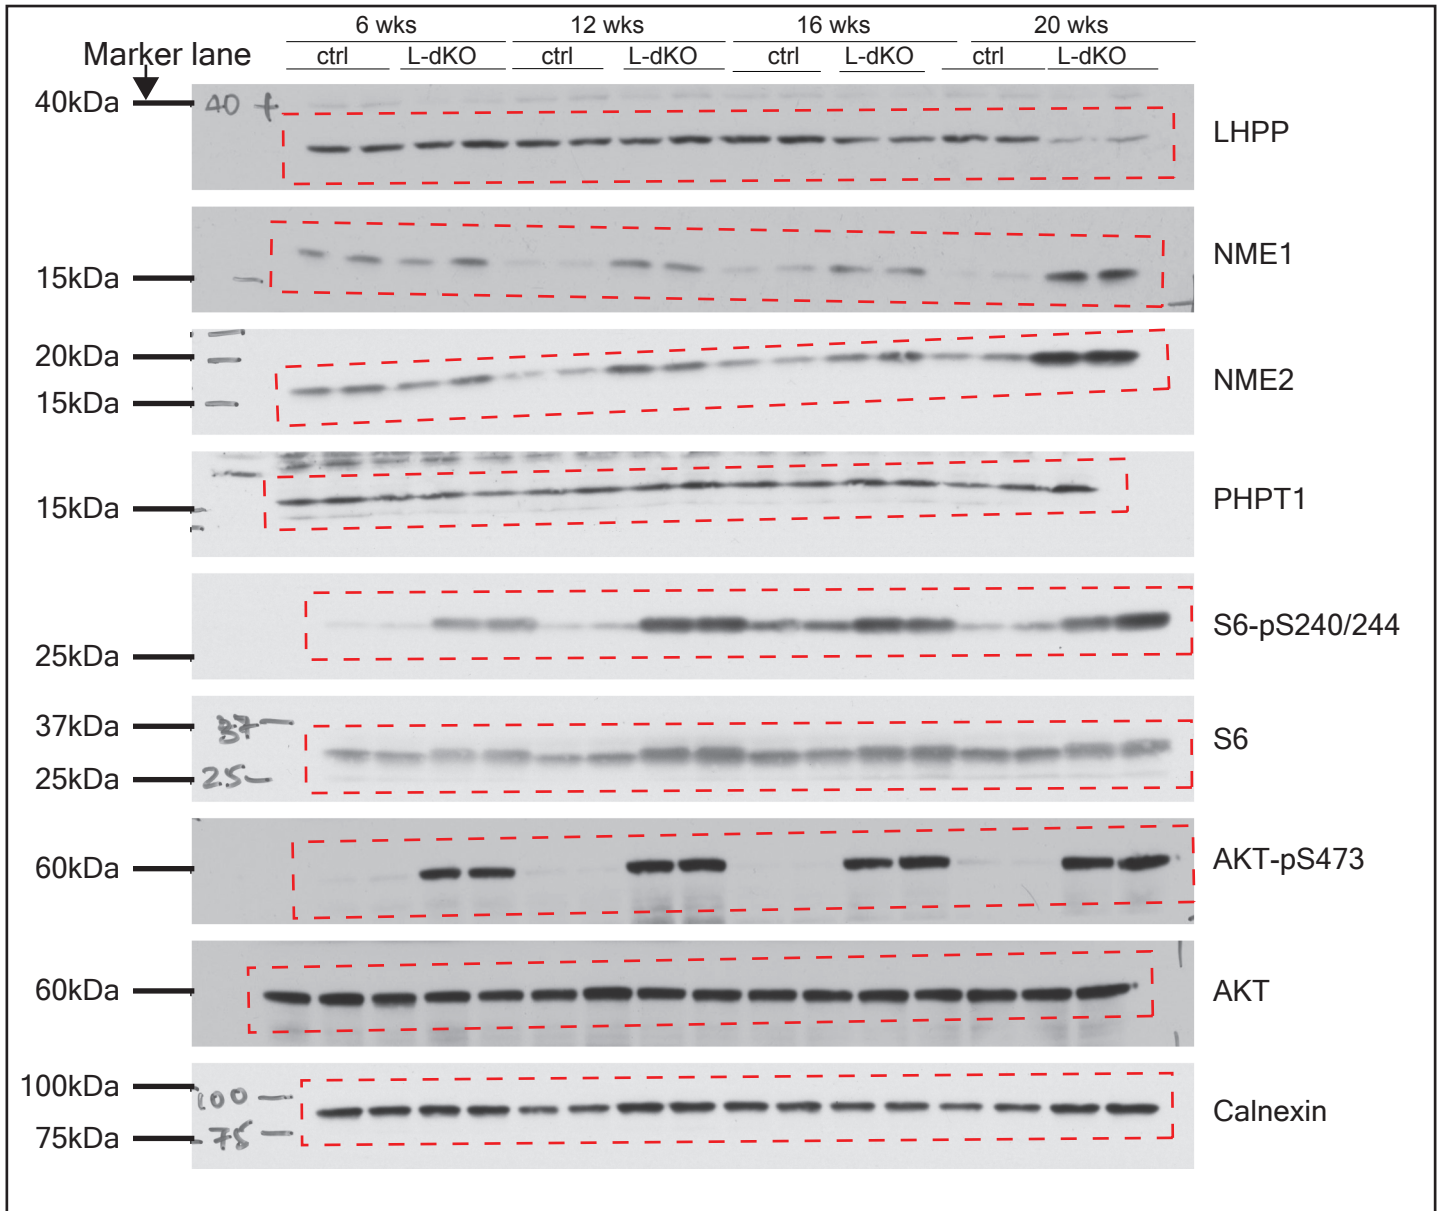

Hindupur\_supplementary figure \_3

Extended data 3b

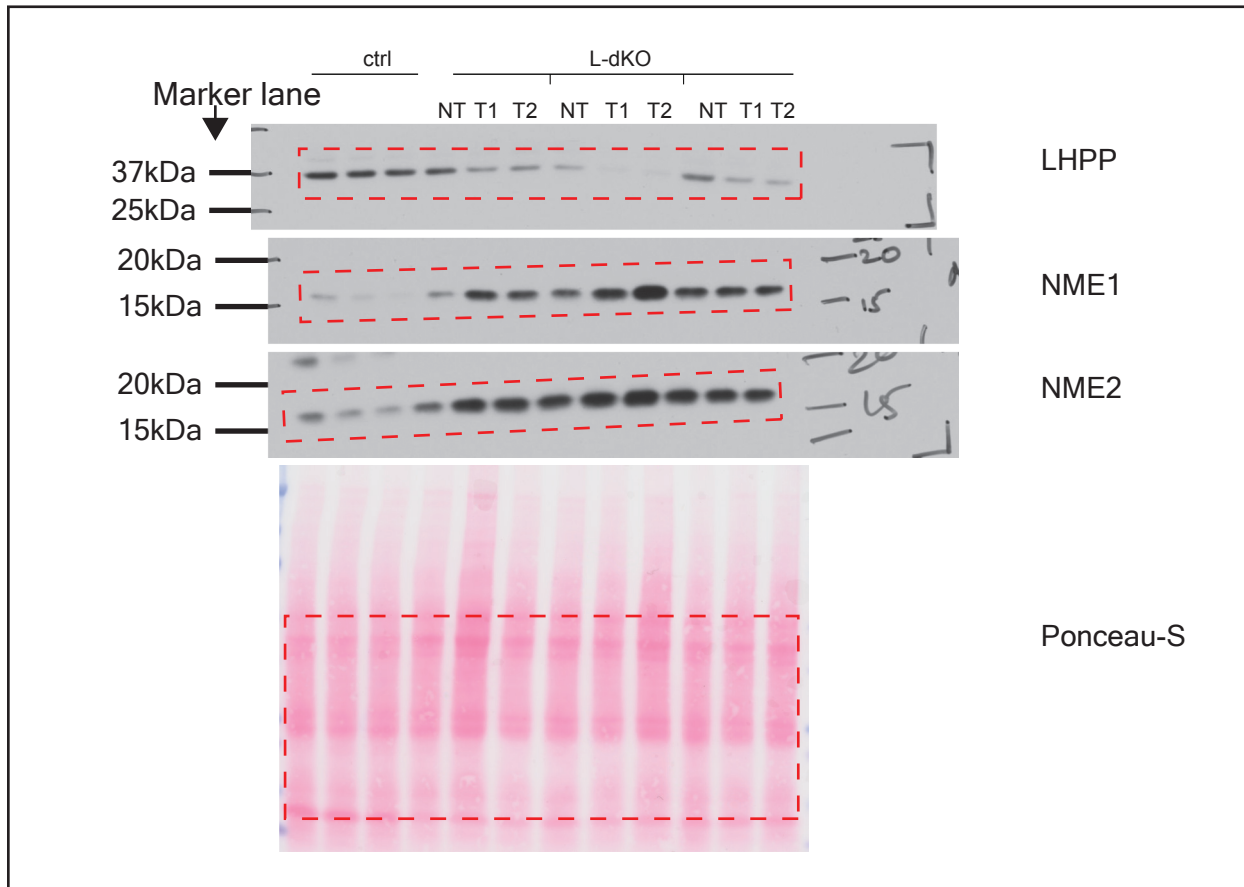

Extended Data 3d

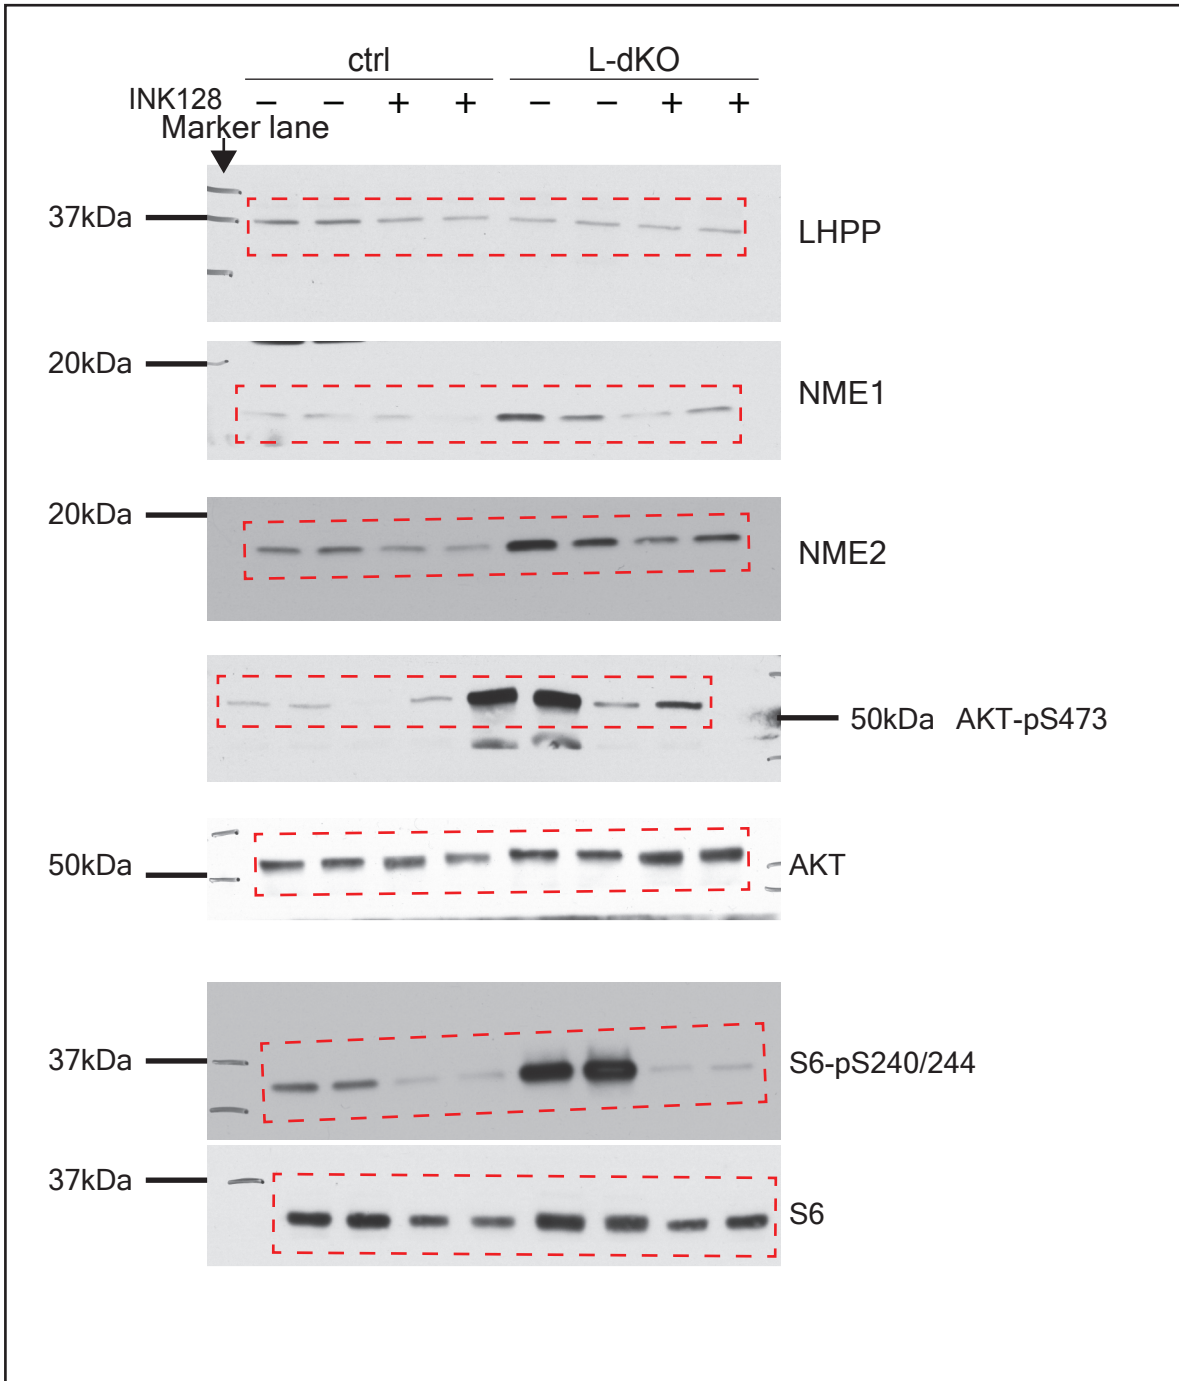



Hindupur\_supplementary figure \_5

Figure 3a

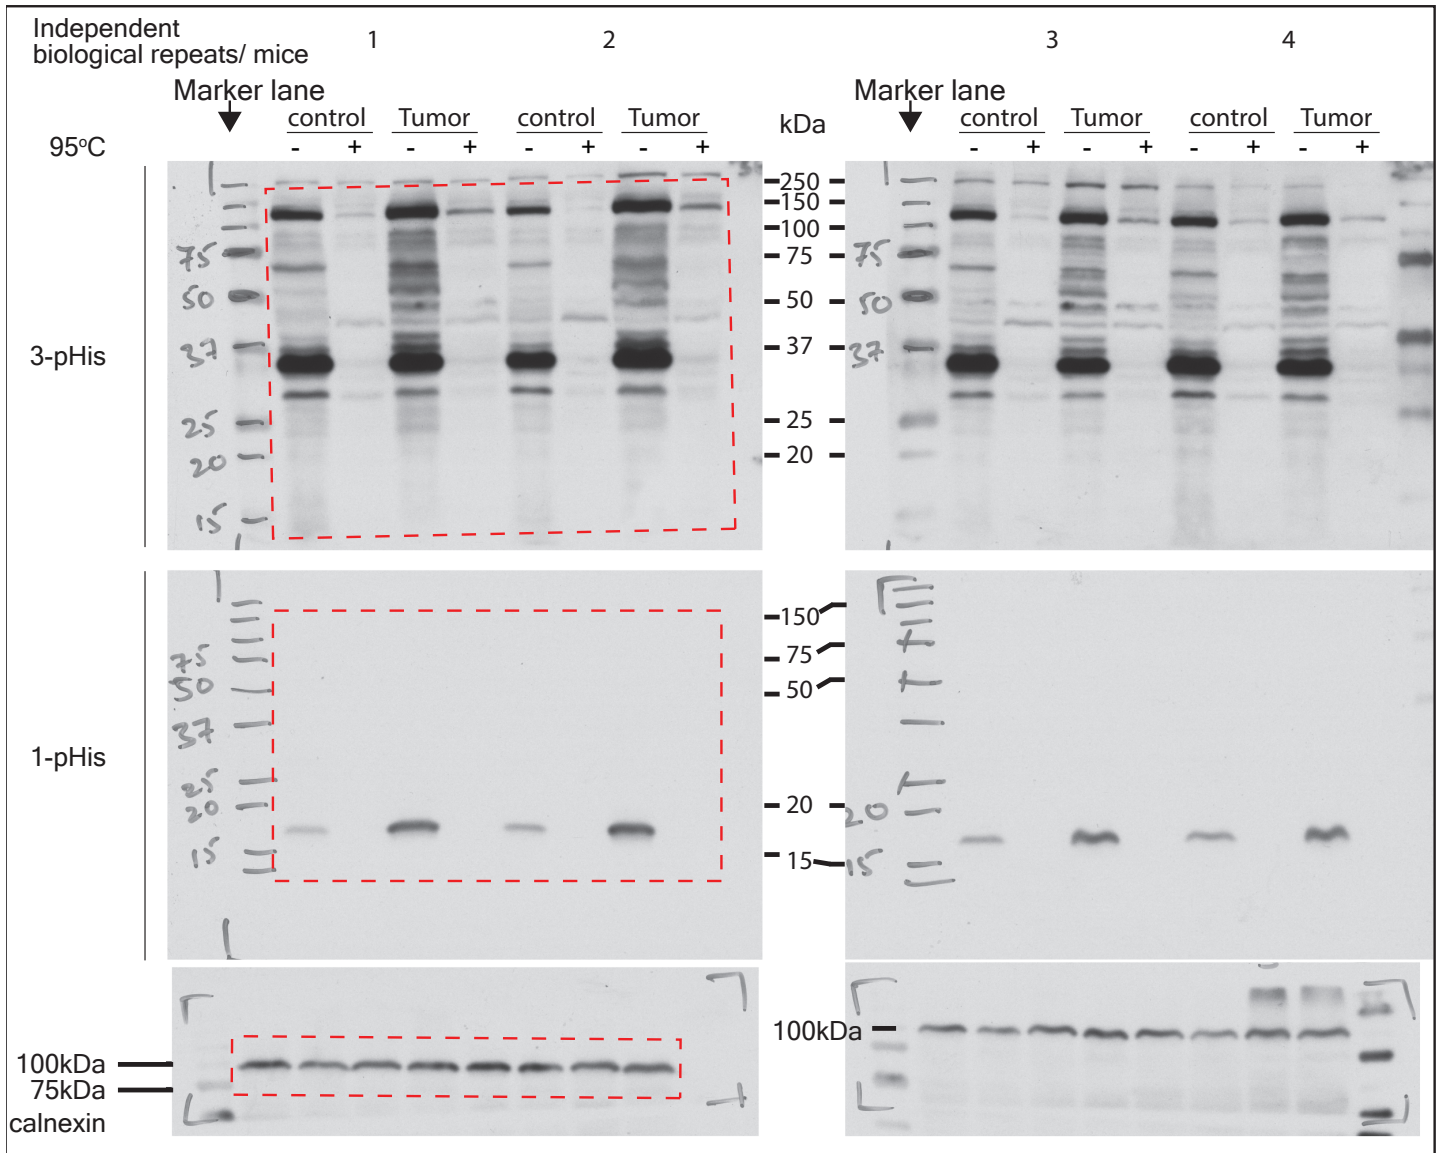

Hindupur\_supplementary figure \_6

Extended Data 4b

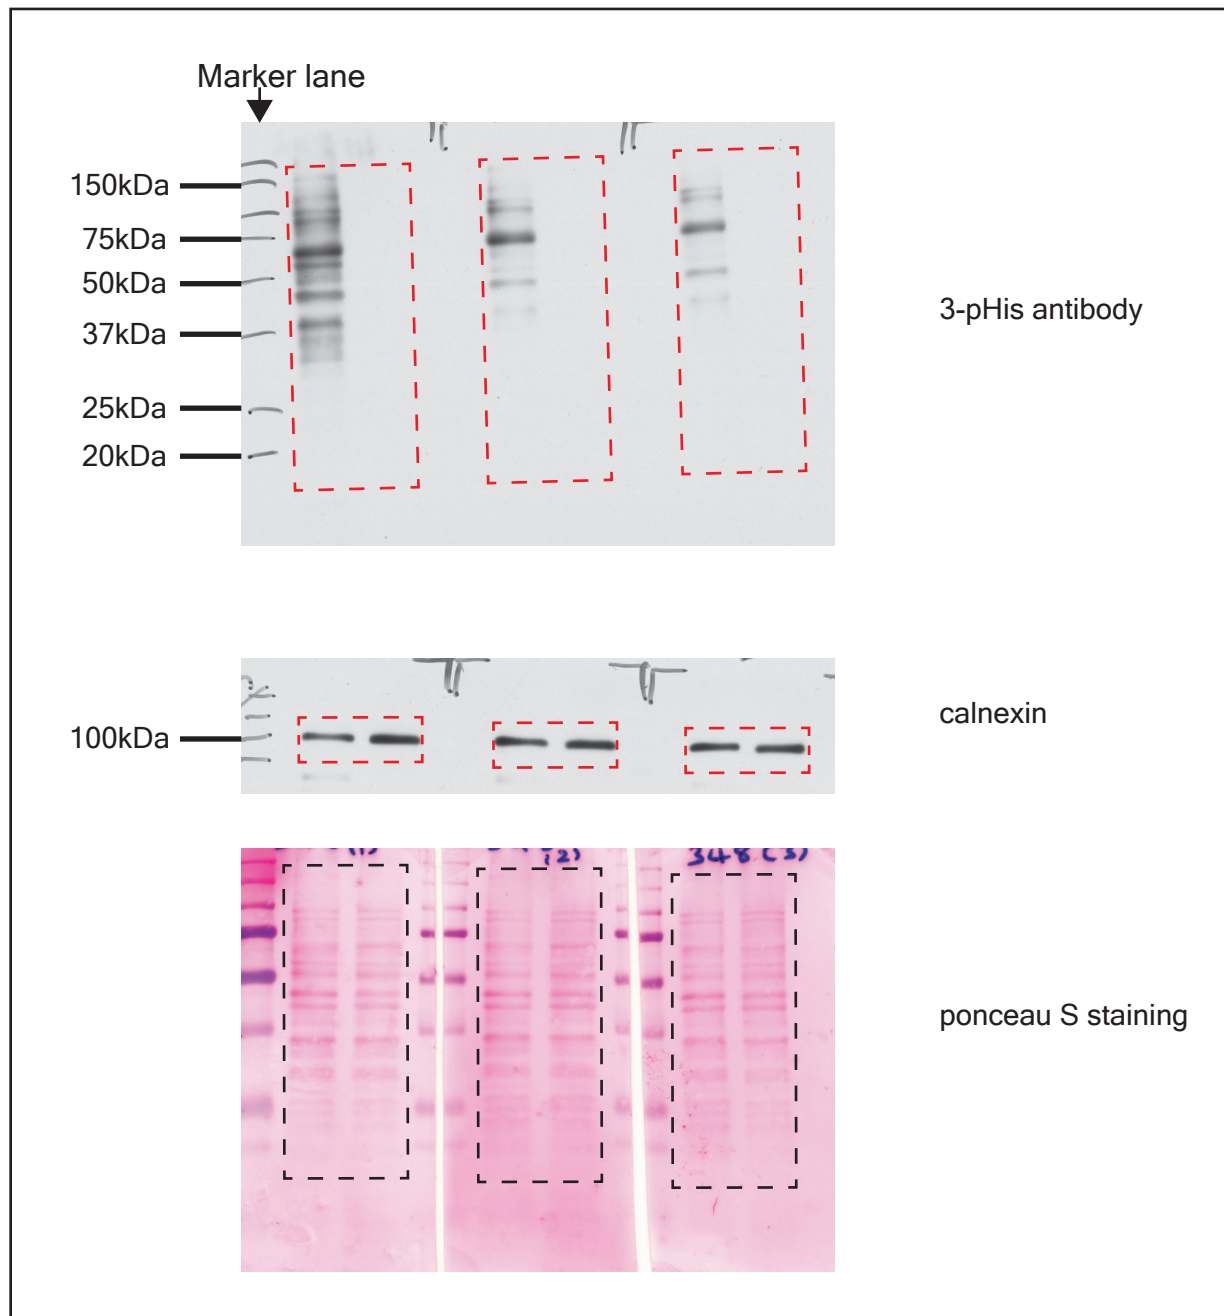

Hindupur\_supplementary figure\_7

Figure 3c

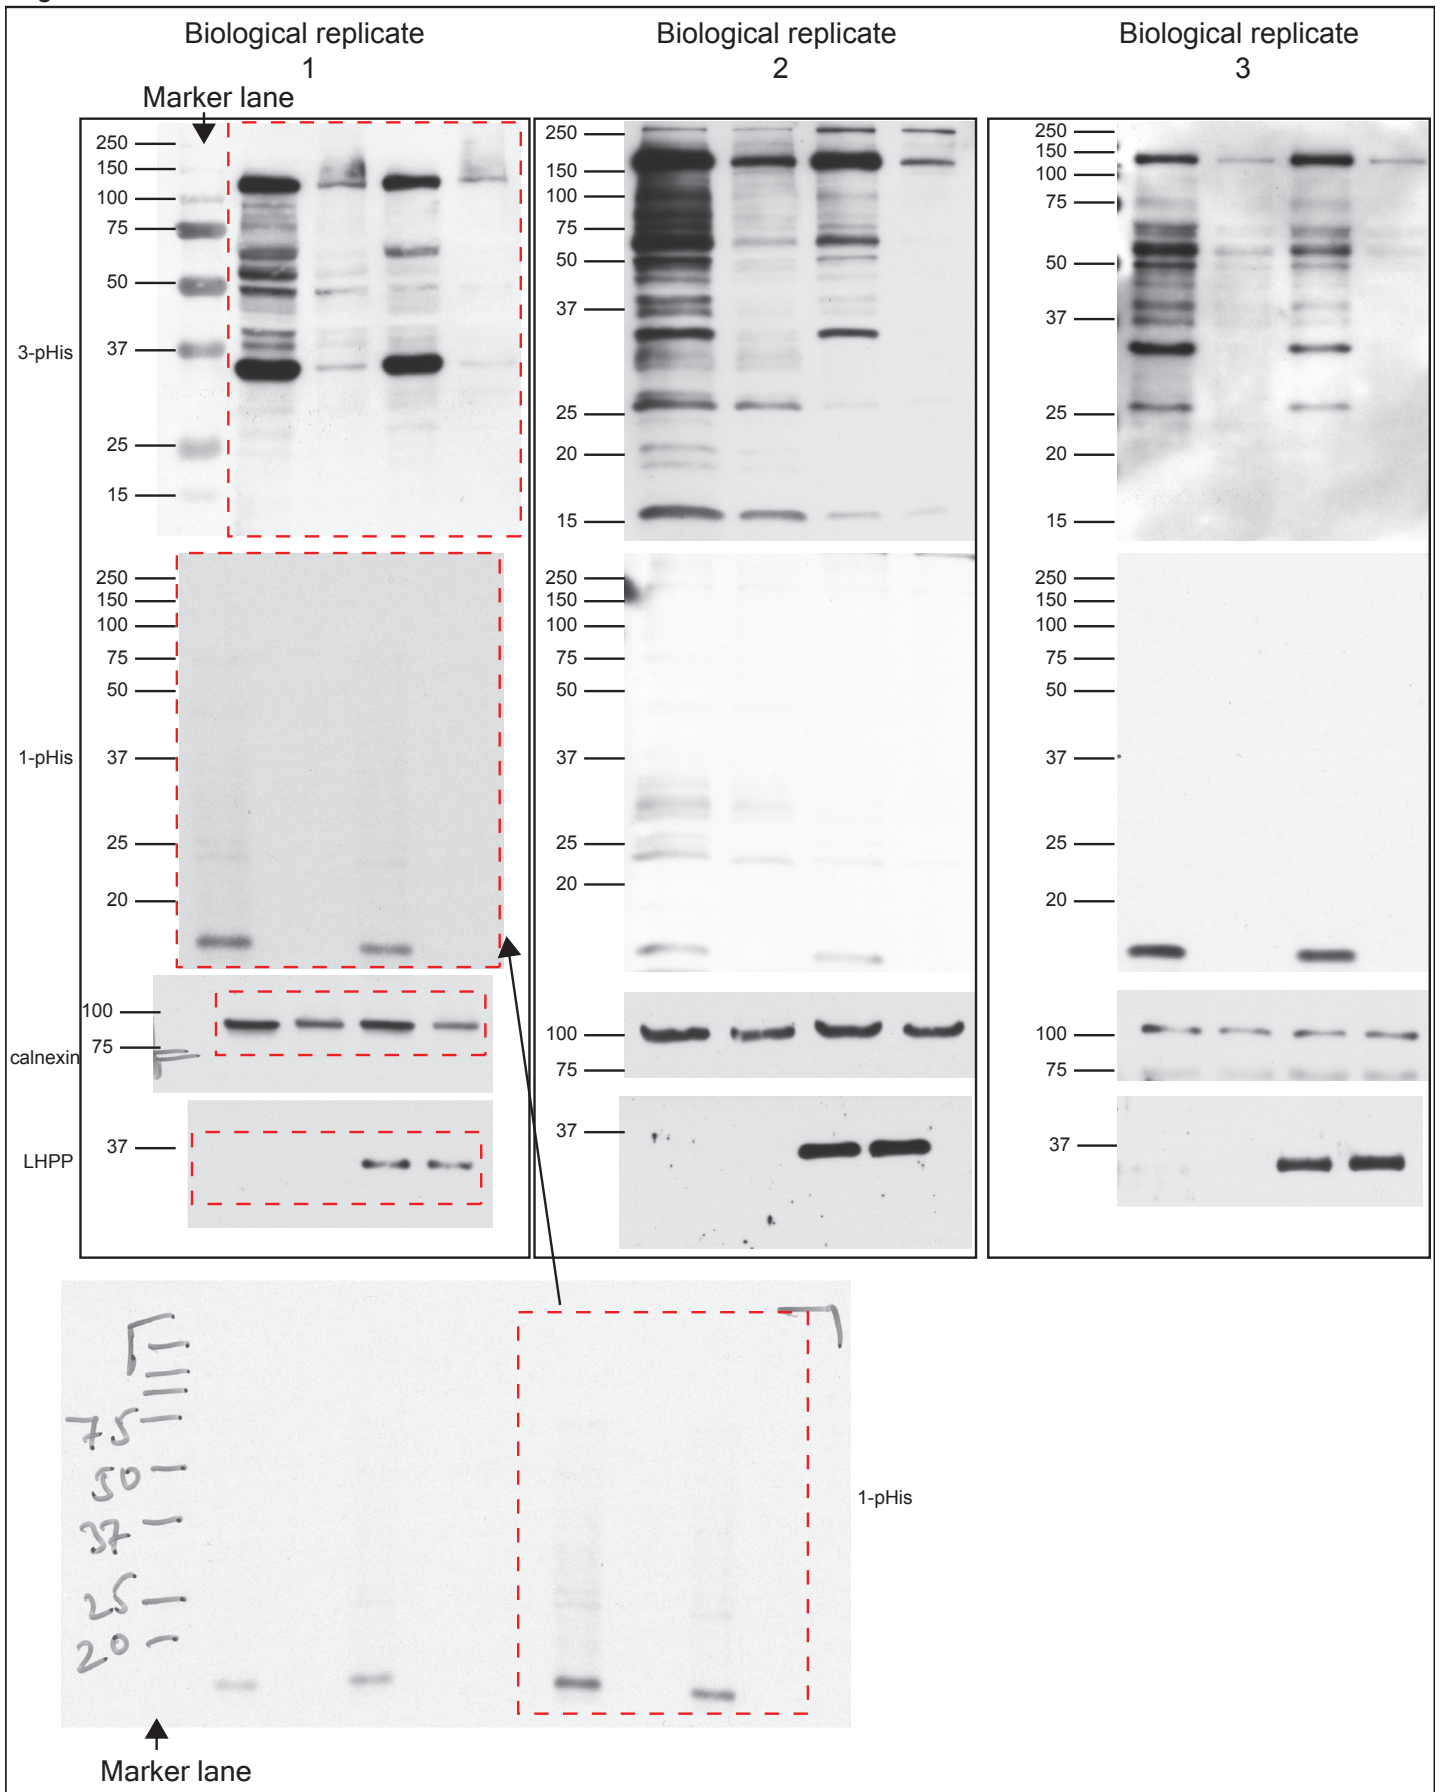

Extended Data 4d

Hindupur\_supplementary figure\_8

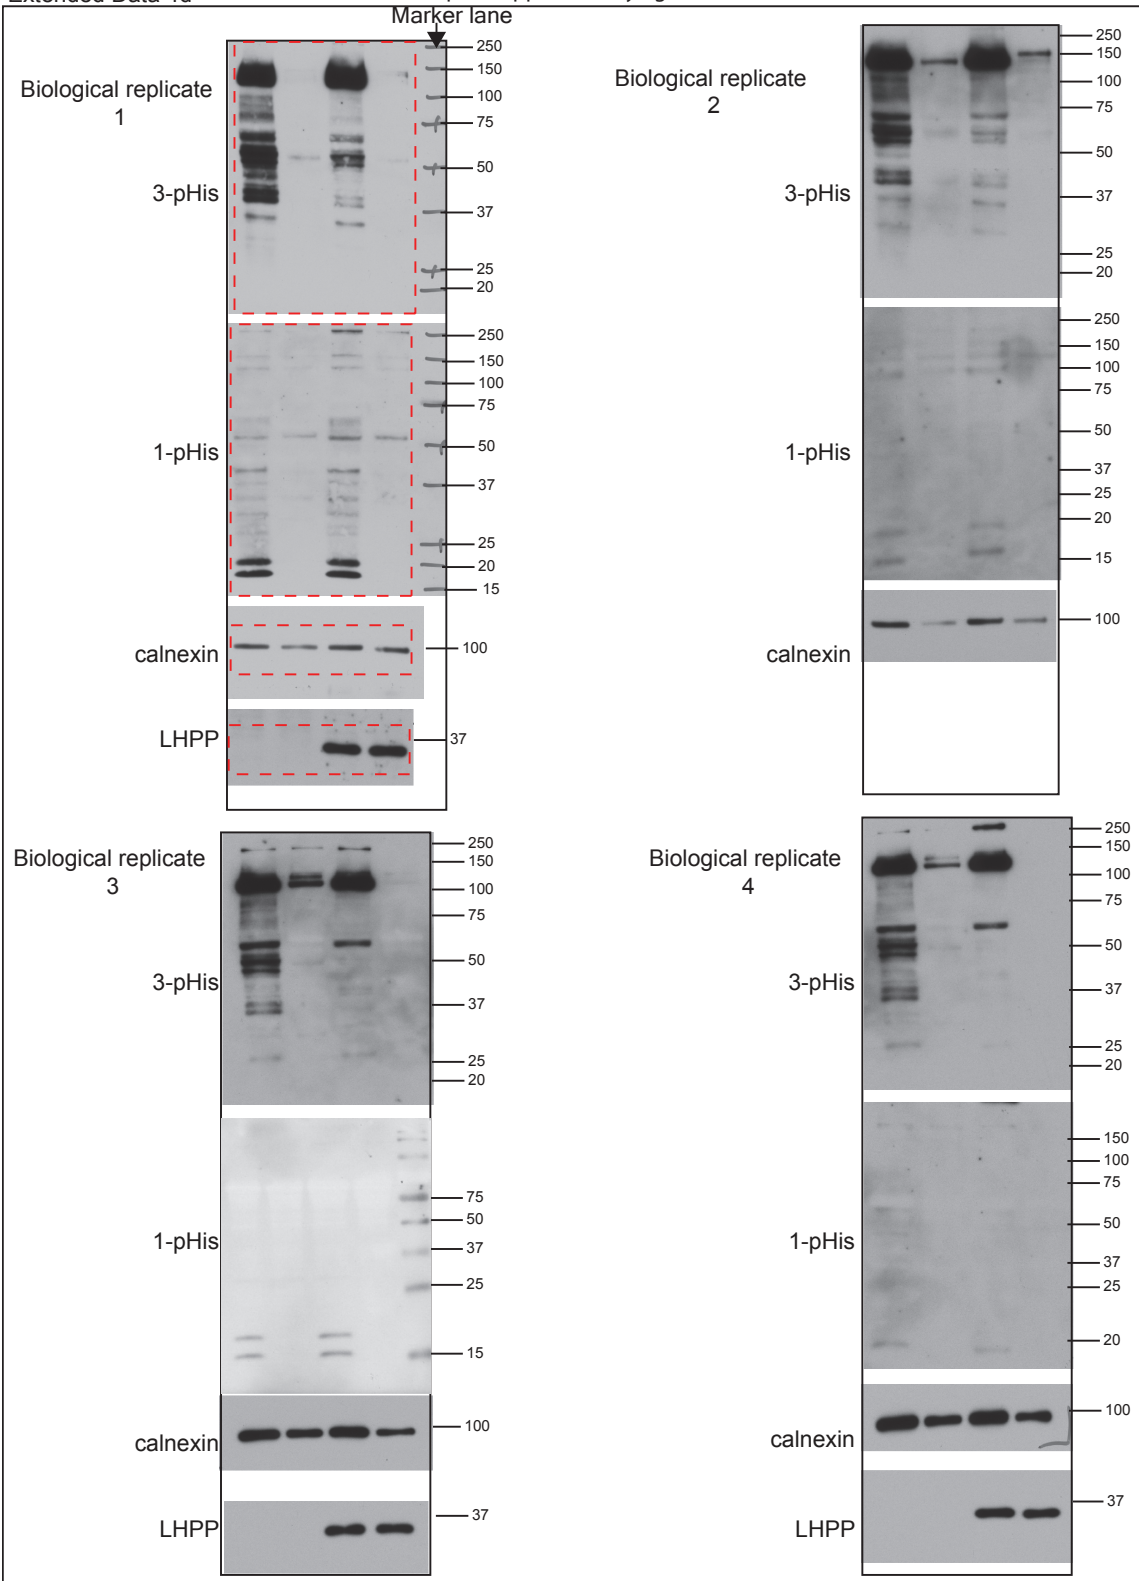



Hindupur\_supplementary figure\_9

Extended data 4c

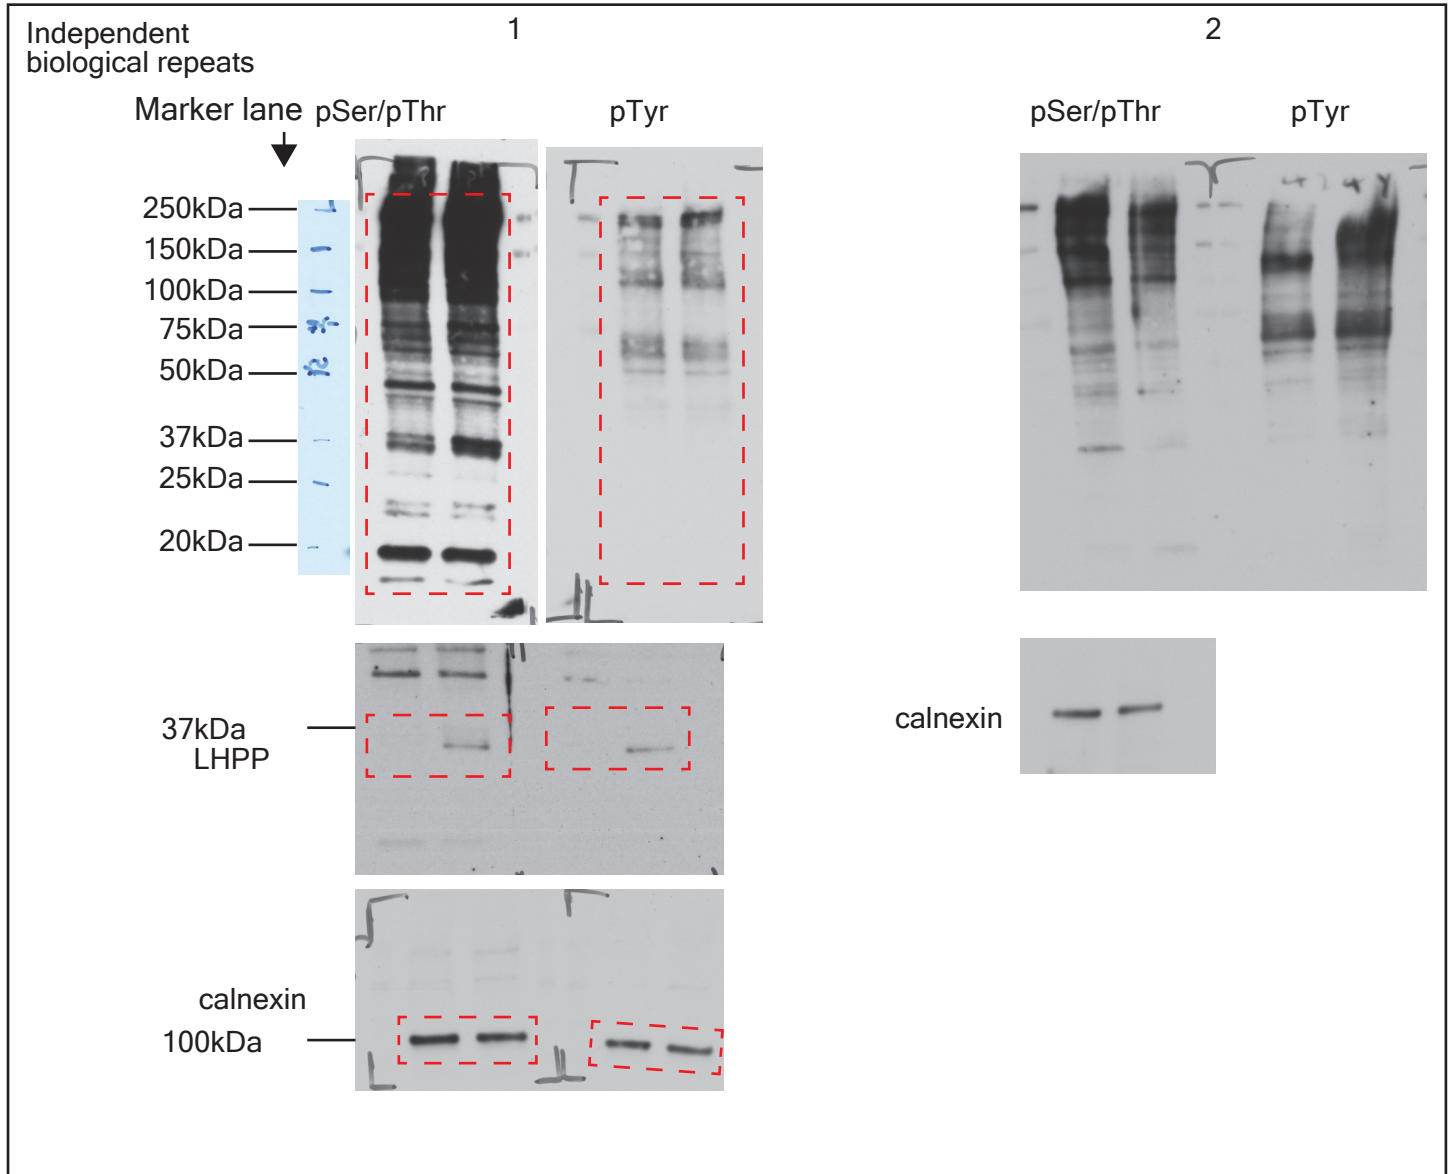

Hindupur\_supplementary figure \_10

Extended Data 5a

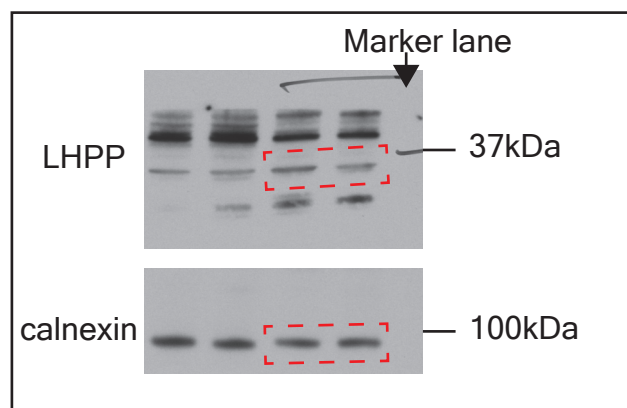

Hindupur\_supplementary figure \_11

Extended Data 5b

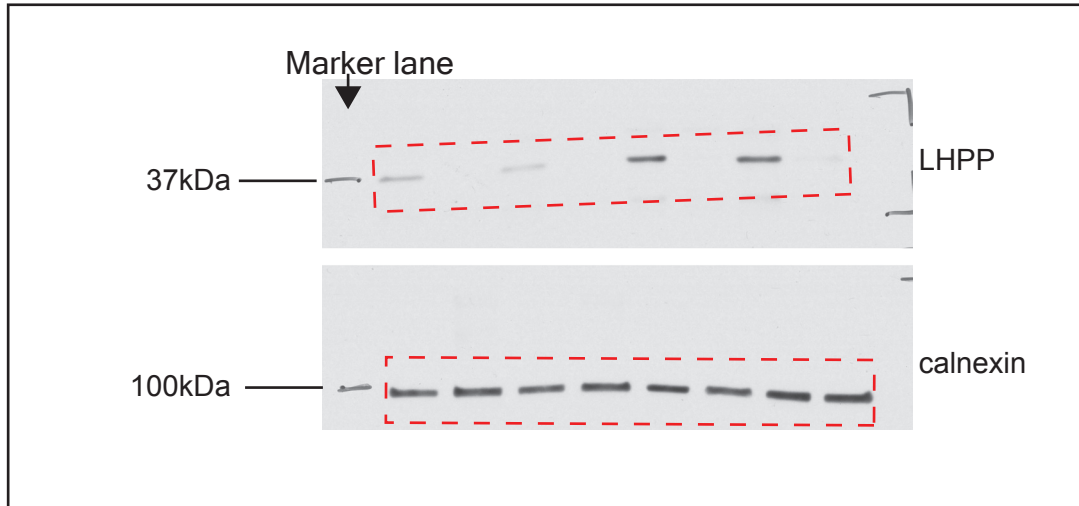



Hindupur\_supplementary figure \_12

Figure 4a

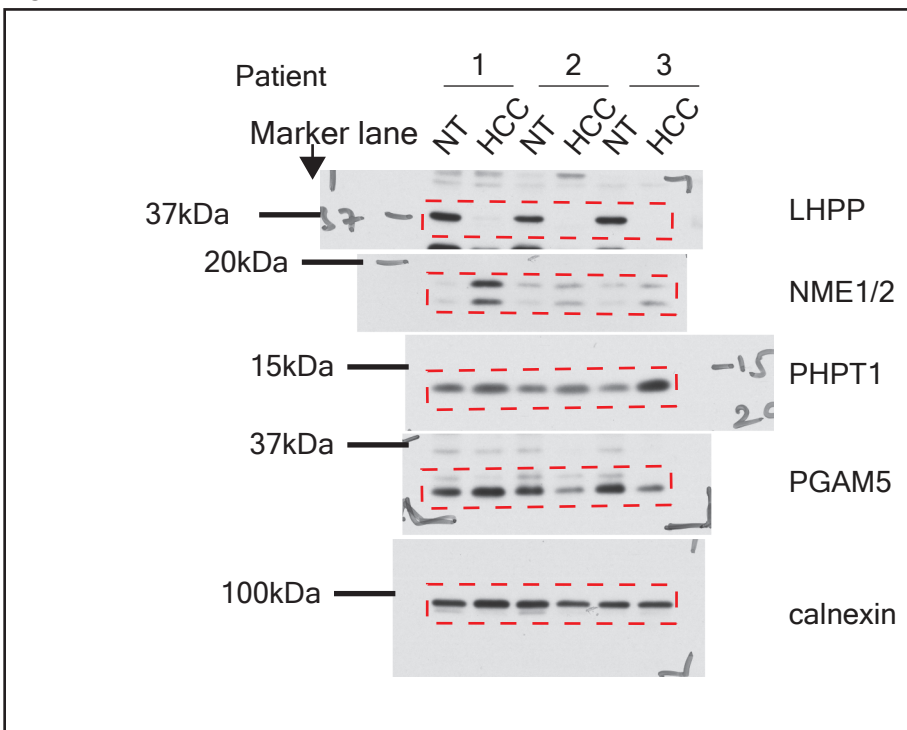

Hindupur\_supplementary figure \_13

Figure 4c

4 Patients

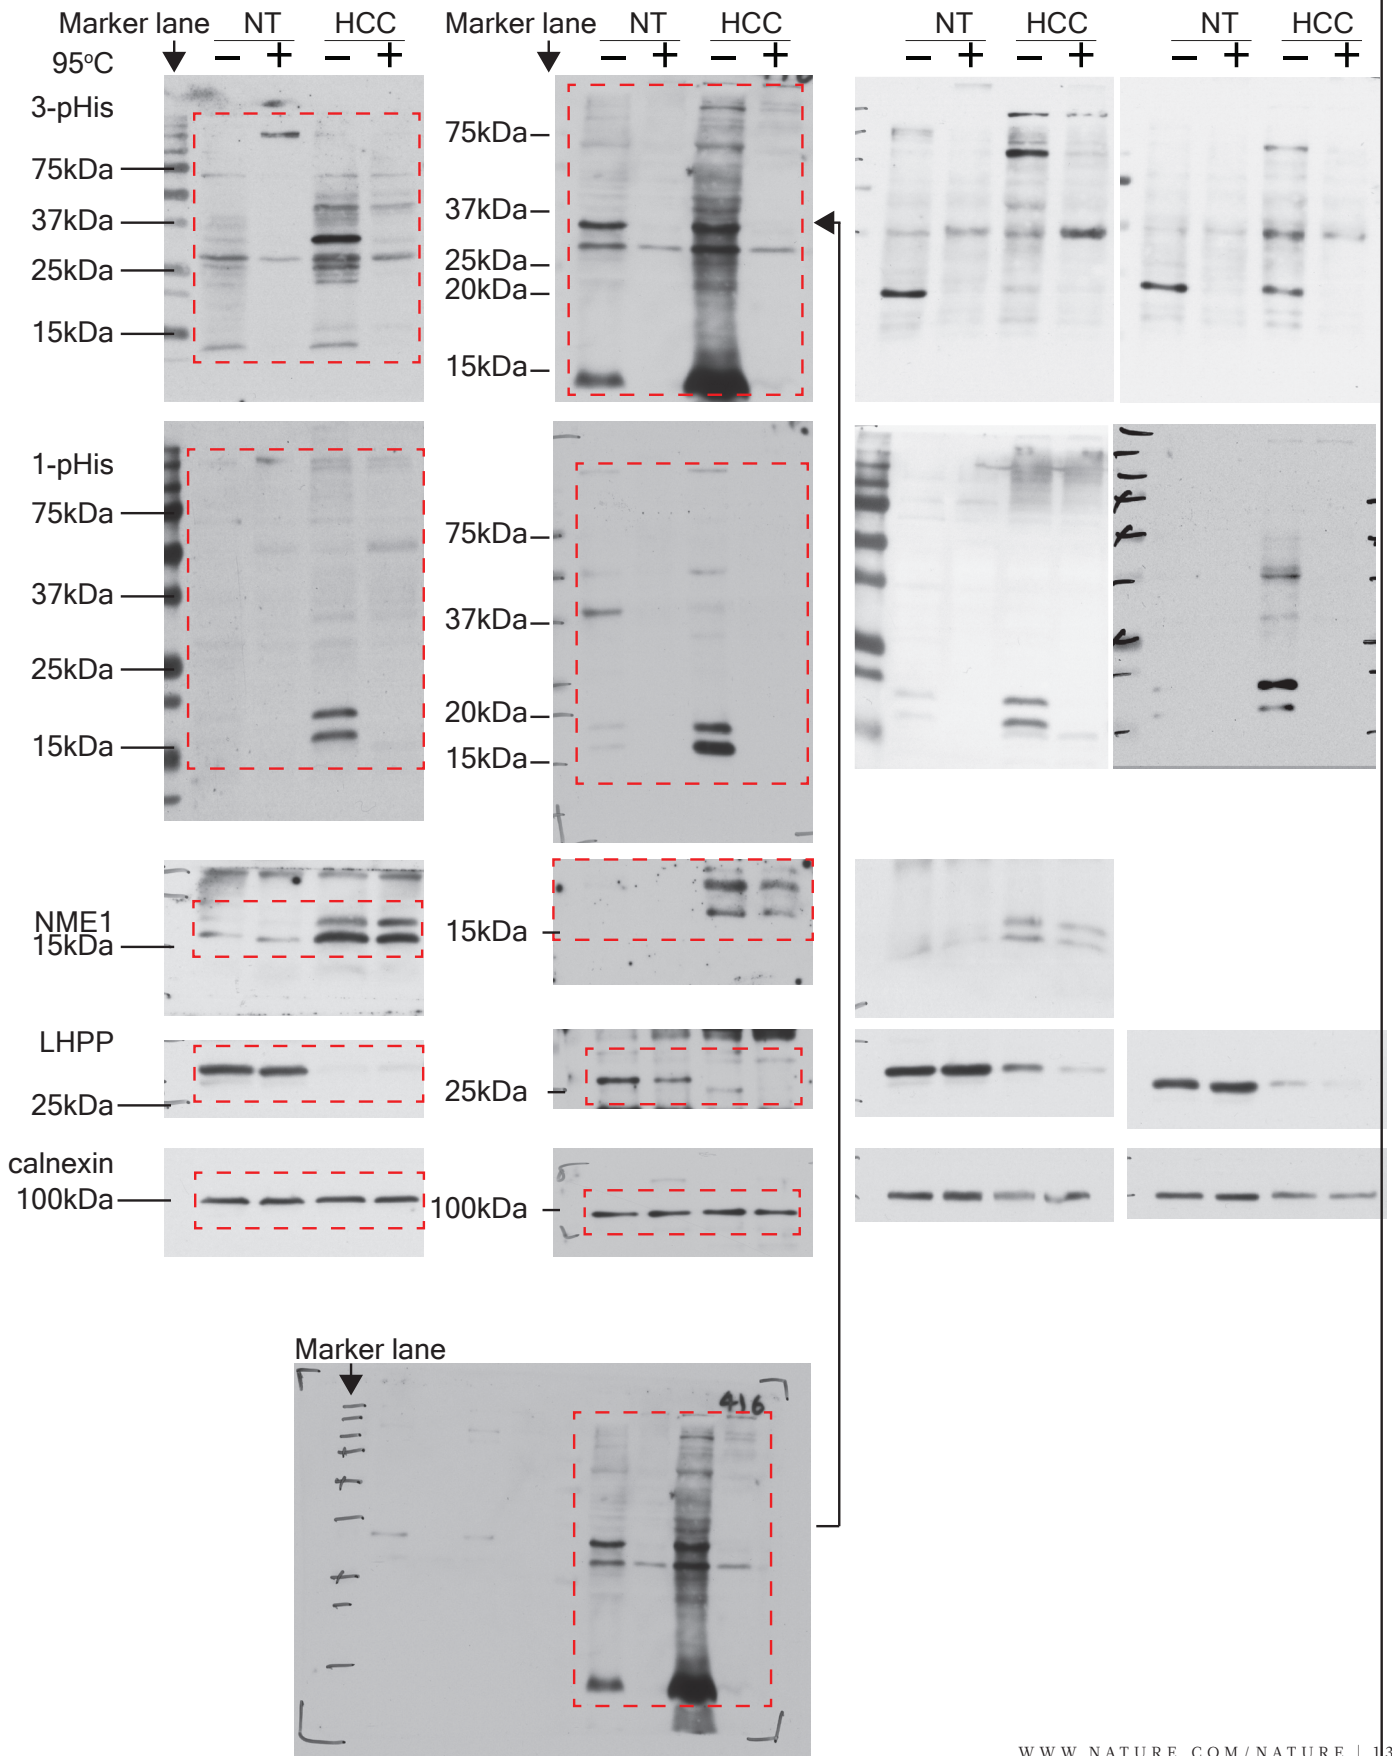

Supplement: NIHMS1004829-supplement-13_Supplementary_figures_Hindupur_et_al.pdf [file NIHMS1004829-supplement-13_Supplementary_figures_Hindupur_et_al.pdf]
